# Supplementary material for: Systemic Ablation of Camkk2 Impairs Metastatic Colonization and Improves Insulin Sensitivity in TRAMP Mice: Evidence for Cancer Cell-Extrinsic CAMKK2 Functions in Prostate Cancer
Source: MDPI journal article supplement (doi:10.3390/cells11121890), 2022-06-10
Supplement: s1 [file s1]

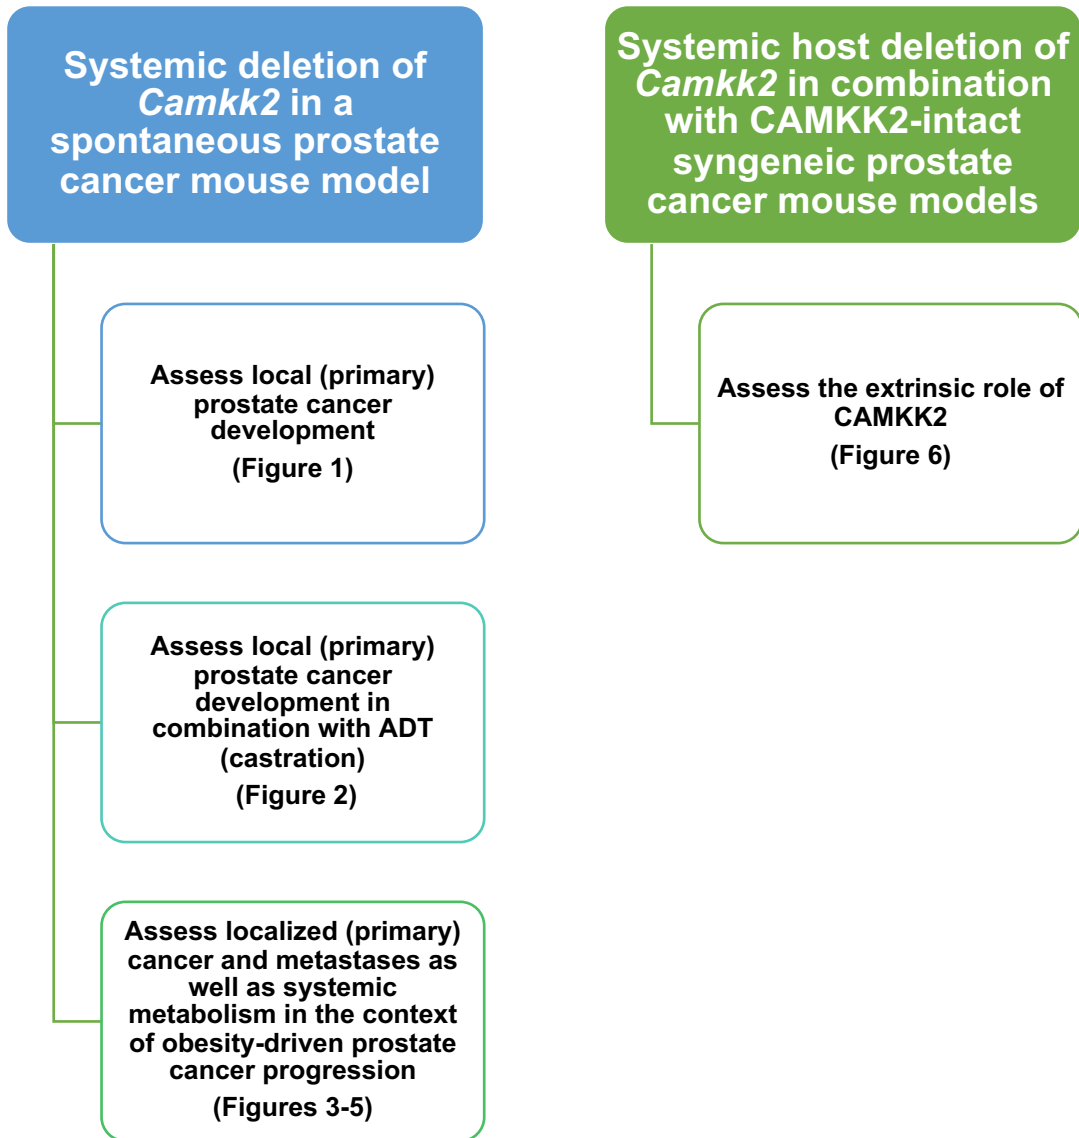

**Supplemental Figure S1: Workflow of study.**

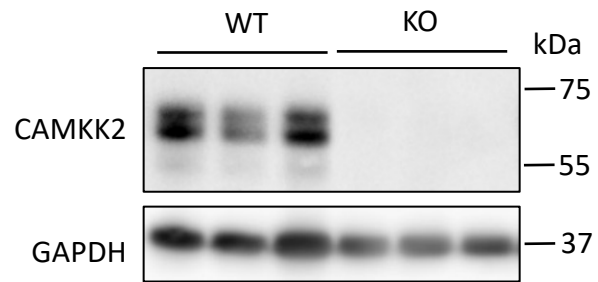

**Supplemental Figure S2: Germline *Camkk2* knockout in C57BL/6 mice confirmed by western blot analysis of brain lysates from *Camkk2*<sup>+/+</sup> (WT) and *Camkk2*<sup>-/-</sup> (KO) mice.**

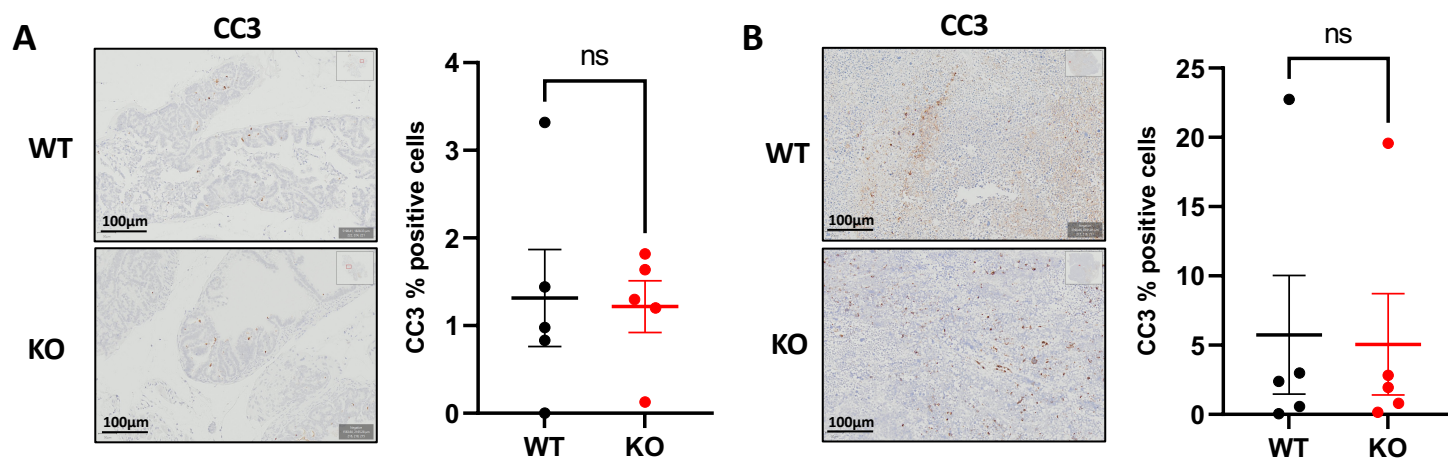

**Supplemental Figure S3: *Camkk2* knockout did not affect apoptosis as measured by cleaved caspase-3 (CC3) staining in prostates/tumors from TRAMP mice.** Cleaved caspase-3 (CC3) staining of prostate/tumors at (A) 15 weeks (WT  $n=5$ , KO  $n=5$ ) and (B) 30 weeks (WT  $n=5$ , KO  $n=5$ ) shows no significant change in staining. ns = not significant by  $t$  test.



*Camkk2* WT ND

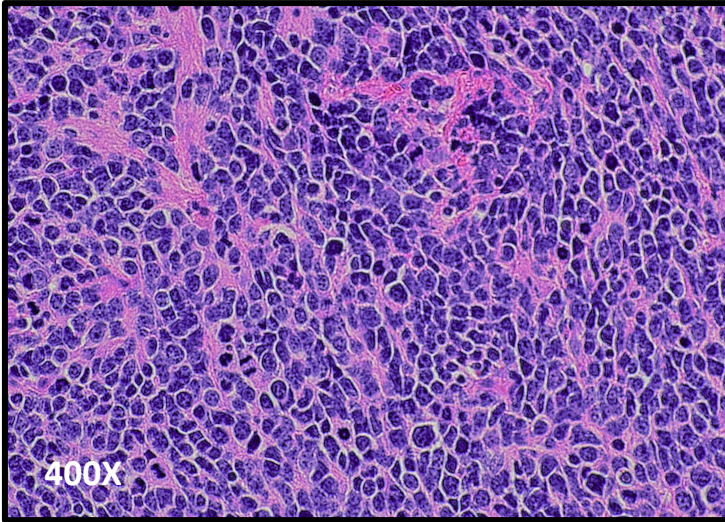

*Camkk2* KO ND

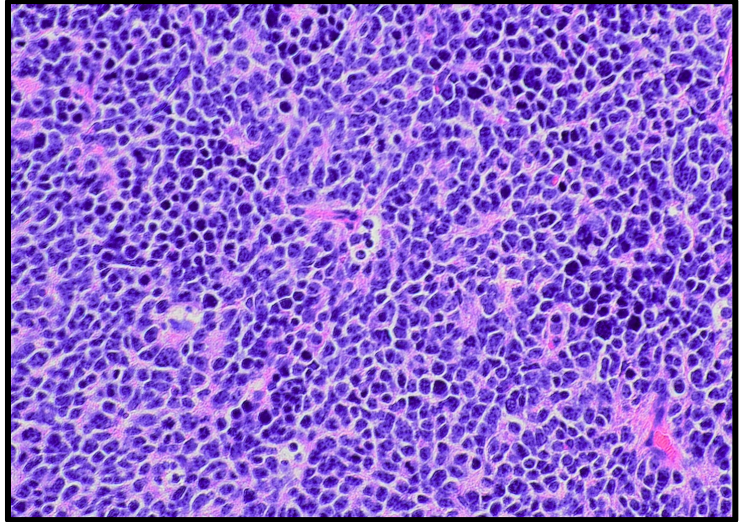

*Camkk2* WT HFD

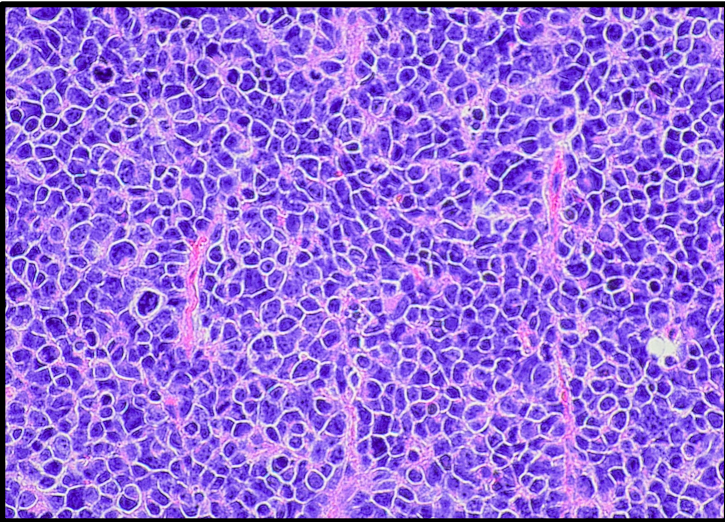

*Camkk2* KO HFD

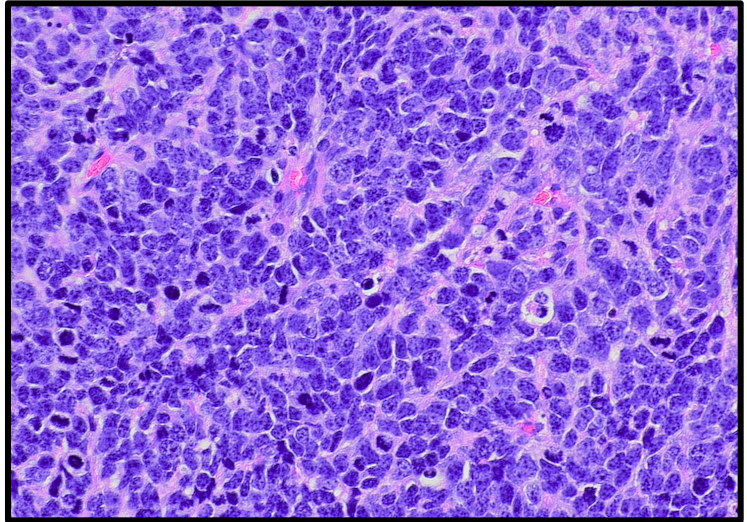

Castrated *Camkk2* WT ND

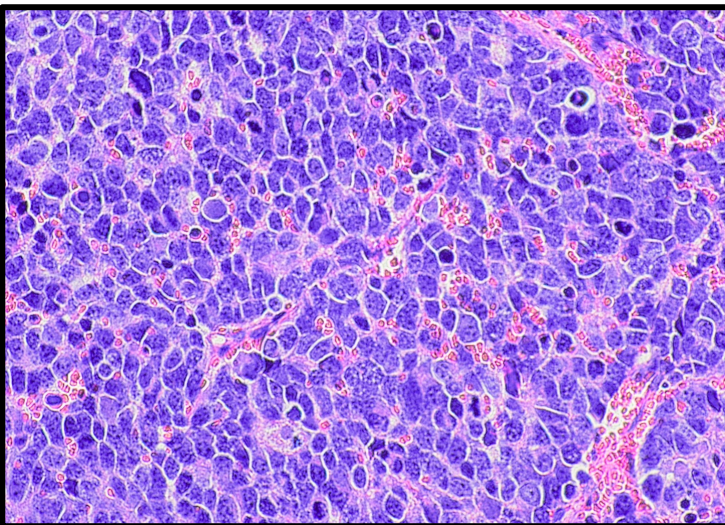

Castrated *Camkk2* KO ND

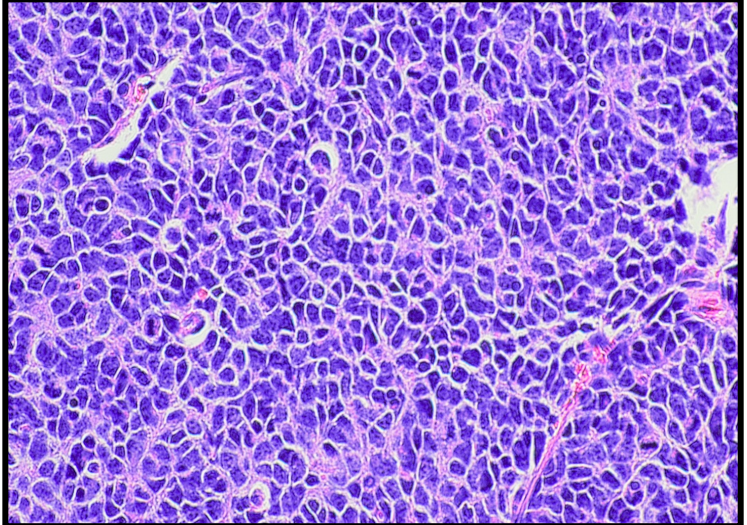

**Supplemental Figure S4: Tumors exhibit classic NEPC morphology at 30 weeks.** Representative high-magnification images are shown of tumors from multiple 30-week old TRAMP mouse cohorts used throughout the study demonstrating characteristic features of NEPC such as reduced cytoplasm, nuclear molding, and granular chromatin. NEPC phenotypes were confirmed by a pathologist (M. Ittmann).



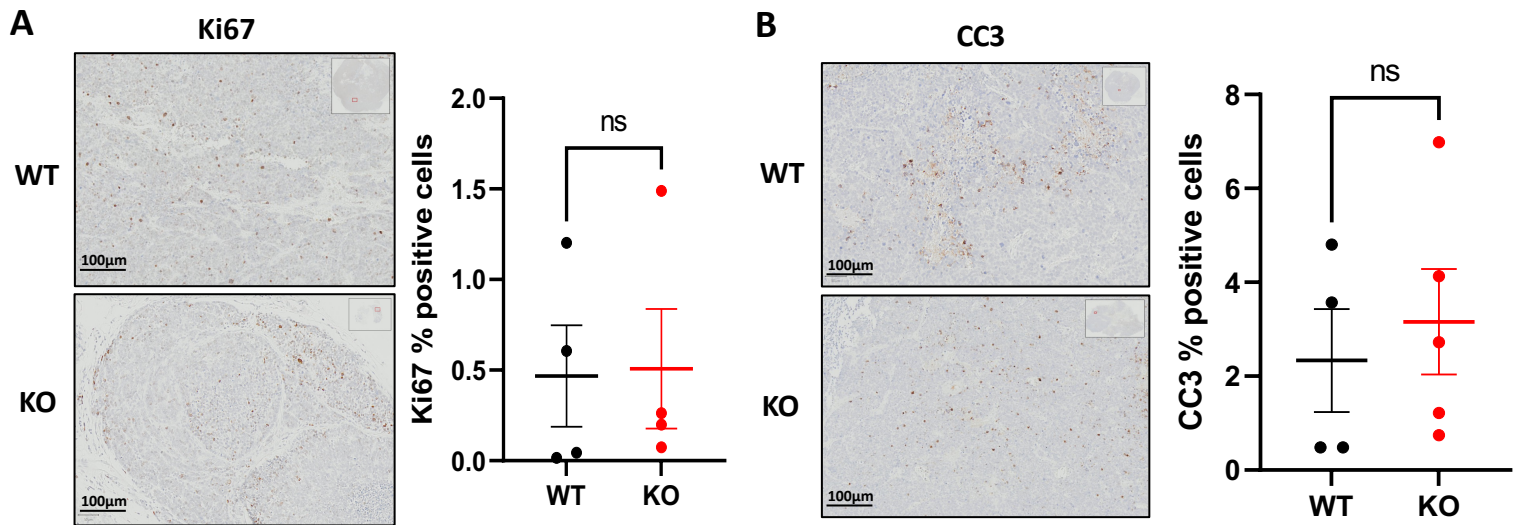

**Supplemental Figure S5: Effects of *Camkk2* knockout in castrated TRAMP mice on proliferation and apoptosis.** (A) Ki67 (WT  $n=4$ , KO  $n=4$ ) and (B) cleaved caspase-3 (CC3) IHC analyses of castrated TRAMP mice (WT  $n=4$ , KO  $n=5$ ). ns = not significant by  $t$  test.

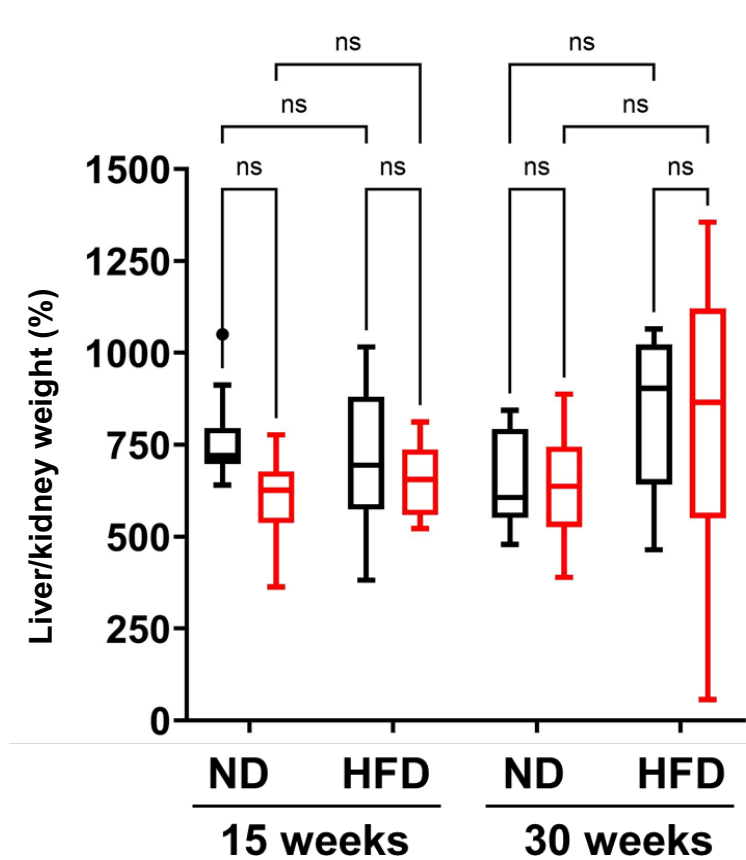

**Supplemental Figure S6: CAMKK2 status did not influence liver weights in TRAMP mice.** Livers were weighed and normalized to kidney weights in 15- and 30-week old TRAMP;*Camkk2*<sup>+/+</sup> (black) and TRAMP;*Camkk2*<sup>-/-</sup> (red) mice fed normal (ND) or high-fat diet (HFD) (15 weeks ND: WT *n*=10, KO *n*=10; 15 weeks HFD: WT *n*=10, KO *n*=8; 30 weeks ND: WT *n*=10, KO *n*=9; 30 weeks HFD: WT *n*=10, KO *n*=9). ns = no significance; Two-way ANOVA.

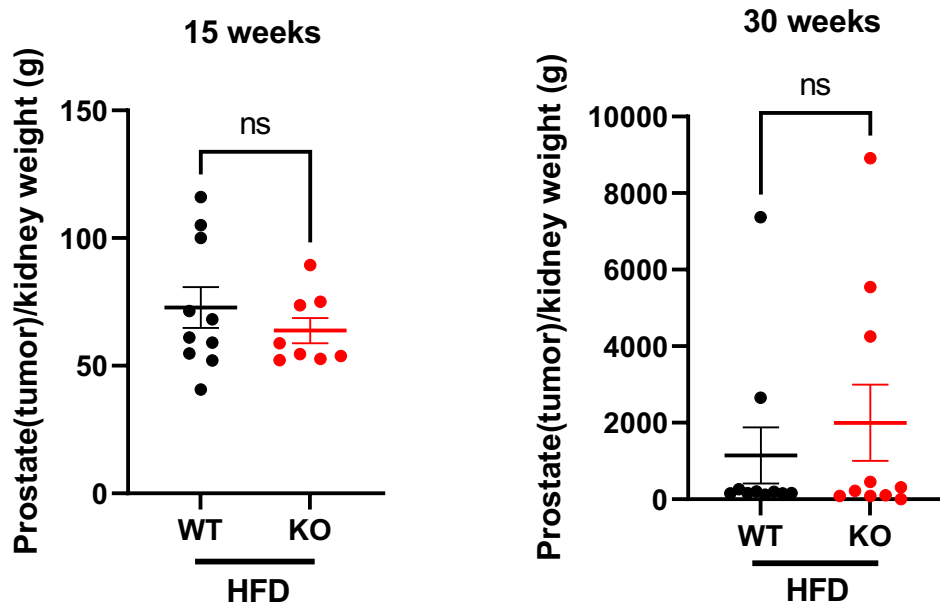

**Supplemental Figure S7: *Camkk2* knockout does not impact prostate/primary tumor weights in high-fat diet (HFD)-fed mice.** Prostate/primary tumor weights normalized to kidney weight at 15 (left) or 30 (right) weeks in HFD-fed mice (15-week HFD WT  $n=10$ ; 15-week HFD KO  $n=8$ ; 30-week HFD WT  $n=11$ ; 30-week HFD KO  $n=10$ ). ns = no significance.

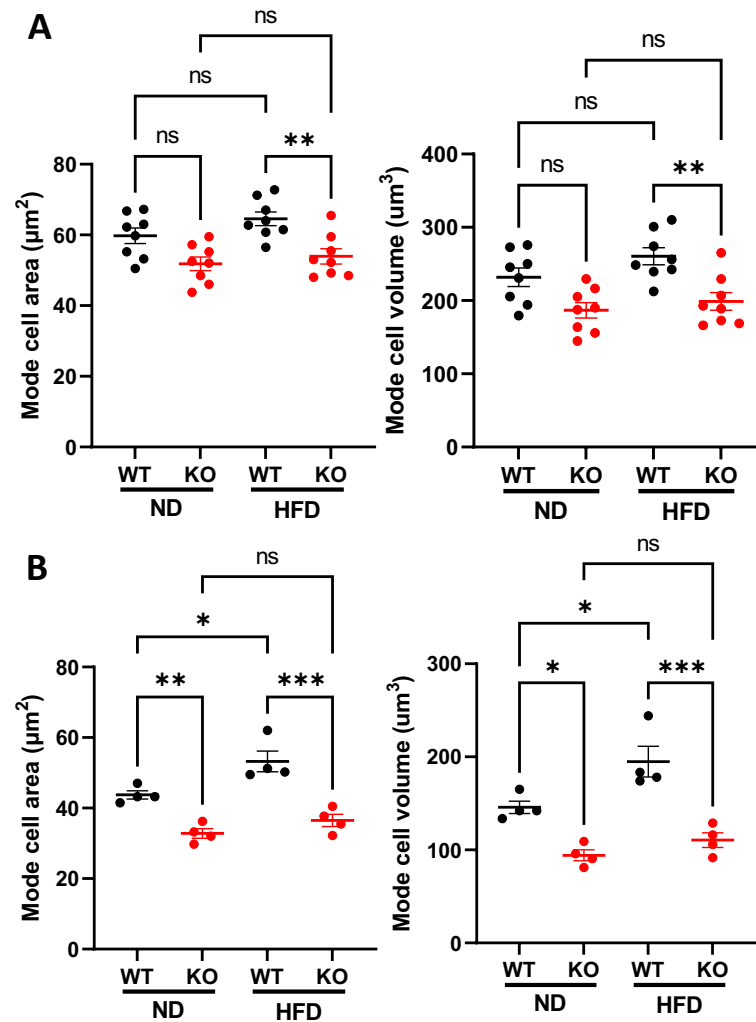

**Supplemental Figure S8: Host *Camkk2* ablation decreased cancer cell size in TRAMP mice.** (A) Mode of individual cell areas and volumes for tumors derived from representative TRAMP;*Camkk2*<sup>+/+</sup> and TRAMP;*Camkk2*<sup>-/-</sup> mice at 30 weeks ( $n=5/\text{group}$ ). (B) Mode of individual cell areas and volumes for lung metastases derived from representative TRAMP;*Camkk2*<sup>+/+</sup> and TRAMP;*Camkk2*<sup>-/-</sup> mice at 30 weeks ( $n=3/\text{group}$ ). ns=not significant; \* $P<0.05$  ; \*\* $P<0.01$ ; \*\*\* $P<0.001$ . For morphometric analysis,  $n>1 \times 10^6$  cells/data point. Average cell areas and volumes are shown in Figure 5.



**A**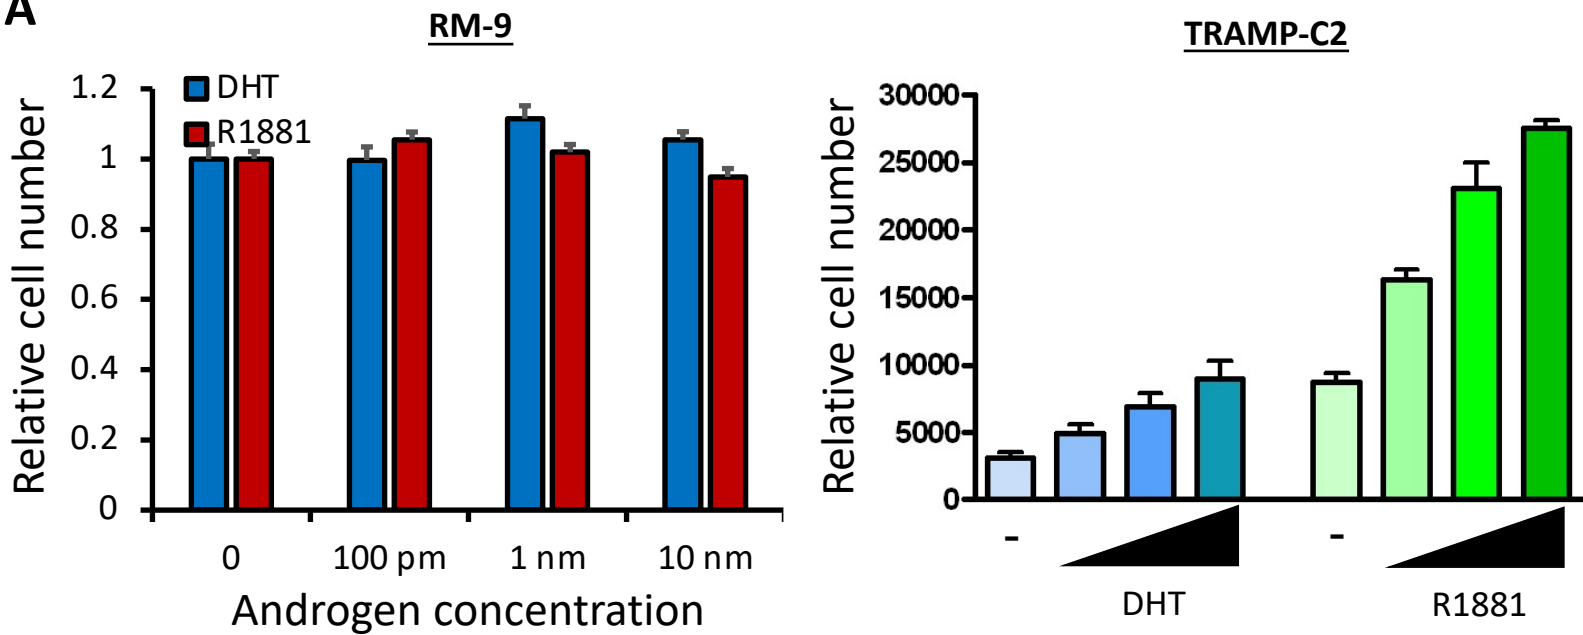**B**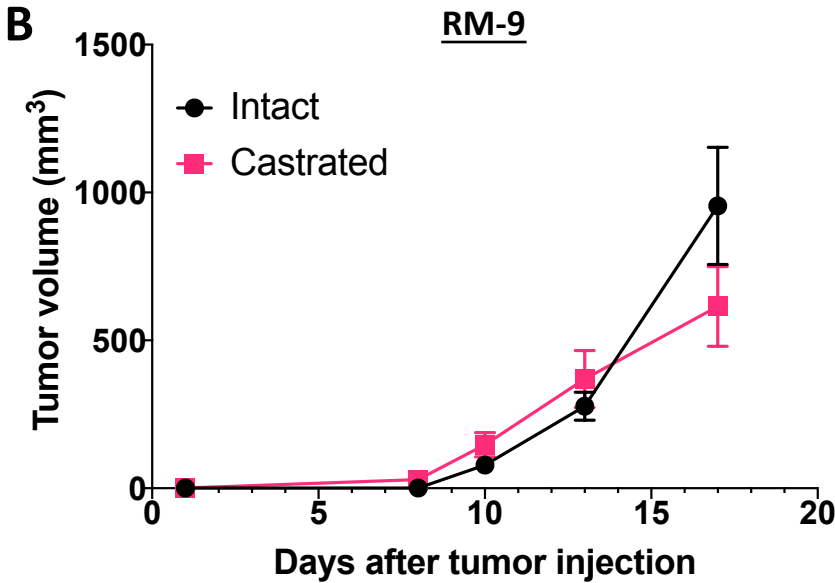

**Supplemental Figure S9: Androgen responsive status of TRAMP-C2 and RM-9 cells.** (A) RM-9 or TRAMP-C2 murine prostate cancer cells were treated with a dose response (0, 100 pM, 1 nM, 10 nM) of androgens (DHT and R1881) for 7 days and relative cell numbers were quantified using a Hoechst-based DNA dye. Results are expressed as relative cell number + SE. (B) 50,000 RM-9 cells were subcutaneously injected into intact (black;  $n=10$ ) or castrated (red;  $n=7$ ) syngeneic C57BL/6 mice. Tumor growth was monitored by calipers. In our hands, TRAMP-C2 had a low take rate in castrated mice (data not shown).

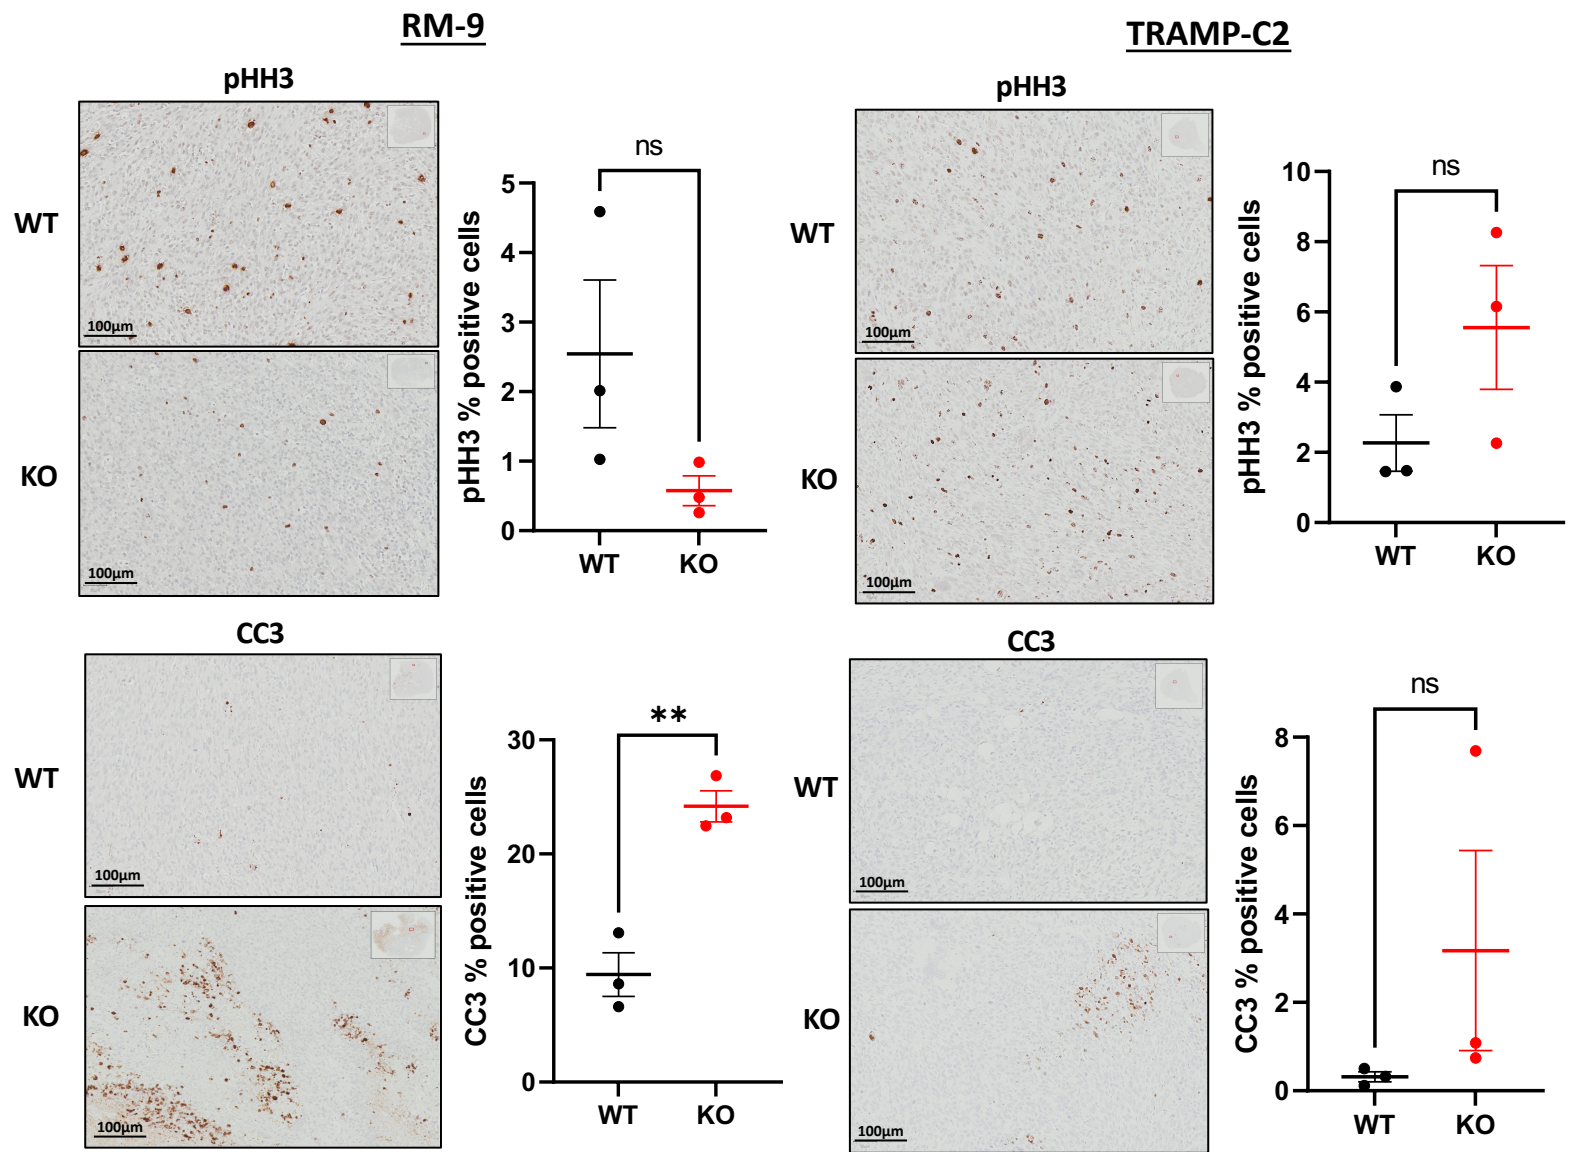

**Supplemental Figure S10: Impact of CAMKK2 status on proliferation and apoptosis in syngeneic mouse models of prostate cancer.** Phospho-histone H3 (Serine-10) (pHH3) and cleaved caspase-3 (CC3) staining in RM-9 (*left*) and TRAMP-C2 (*right*) syngeneic models. \*\* $P$  value < 0.01; ns = no significance.

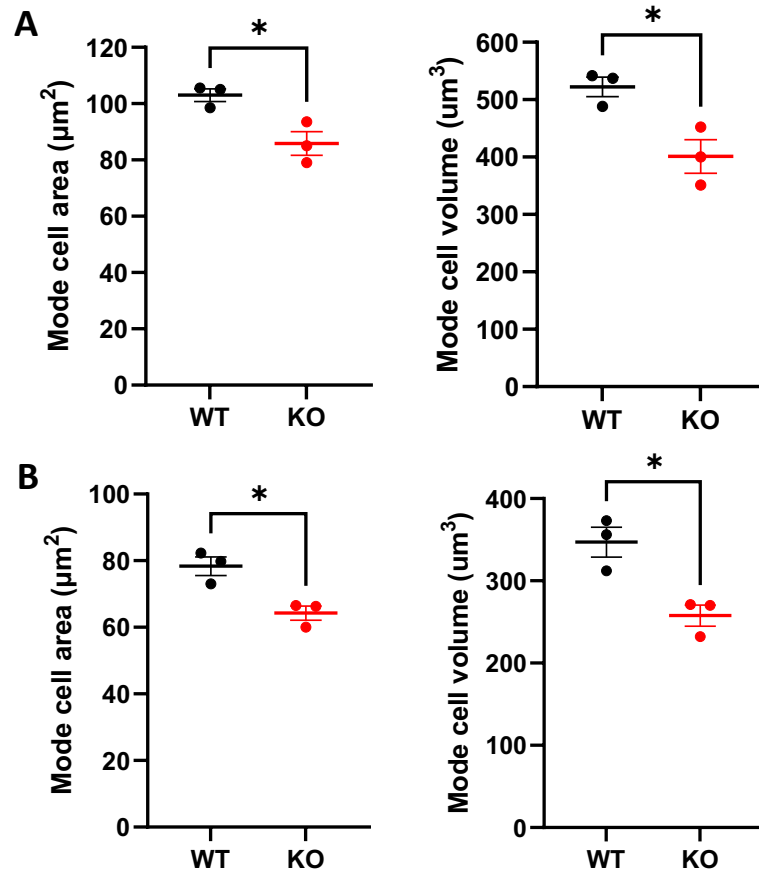

**Supplemental Figure S11: Host *Camkk2* ablation decreases cancer cell size in syngeneic mouse models of prostate cancer.** (A) RM-9 and (B) TRAMP-C2 mode cell area and mode cell volume were quantified from harvested RM-9 (WT  $n=3$ , KO  $n=3$ ) and TRAMP-C2 (WT  $n=3$ , KO  $n=3$ ) syngeneic tumors. ns=not significant;  $*P<0.05$ . For each morphometric analysis,  $n>1 \times 10^6$  cells/data point. Average cell areas and volumes are shown in Figure 6.
