# Supplementary material for: Systemic Ablation of Camkk2 Impairs Metastatic Colonization and Improves Insulin Sensitivity in TRAMP Mice: Evidence for Cancer Cell-Extrinsic CAMKK2 Functions in Prostate Cancer
Source: MDPI journal article supplement (doi:10.3390/cells11121890), 2022-06-10
Supplement: s1 [file s1]

Gross anatomy images and weights of livers from TRAMP;*Camkk2*<sup>+/+</sup> (WT) and TRAMP;*Camkk2*<sup>-/-</sup> (KO) mice fed normal diet (ND) or high-fat diet (HFD).

Representative images shown in Figure 3.

# 15-week HFD KO

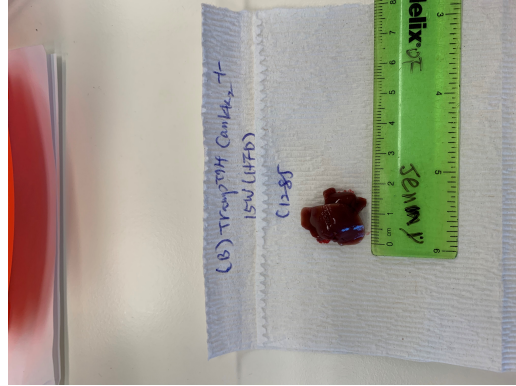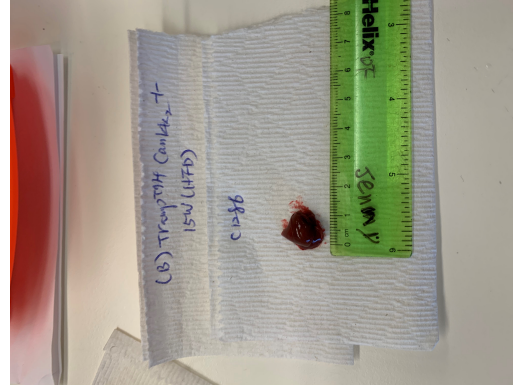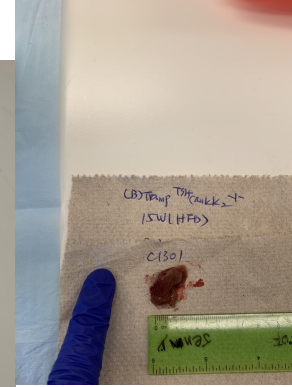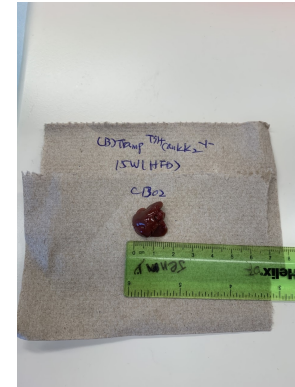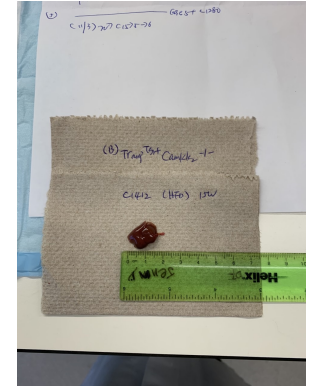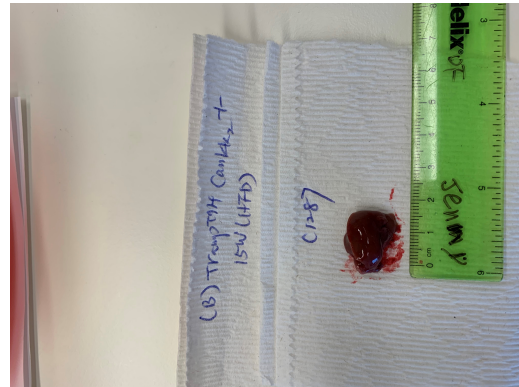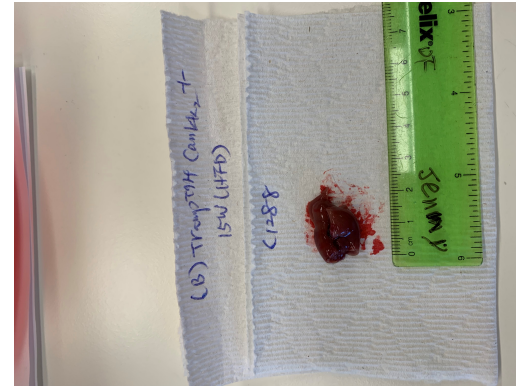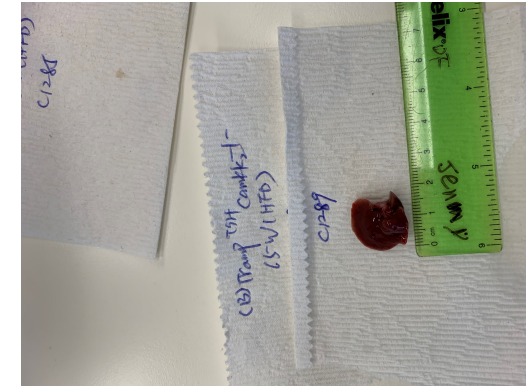

# 15-week HFD WT

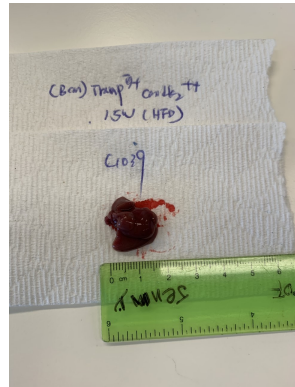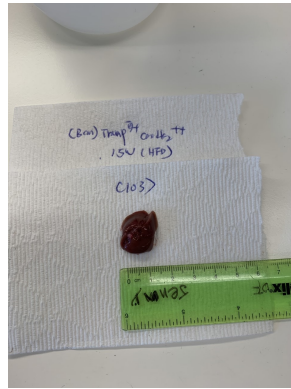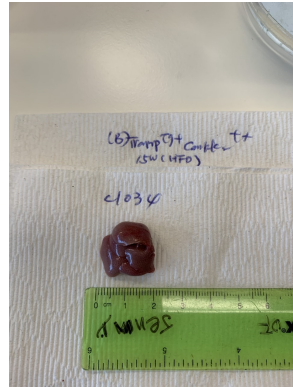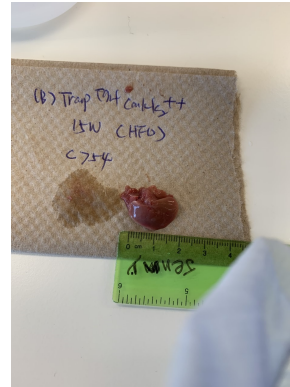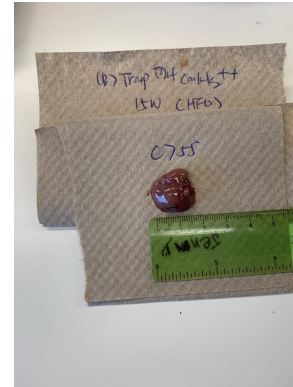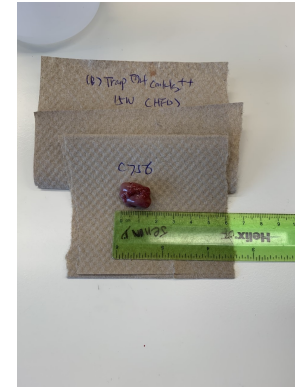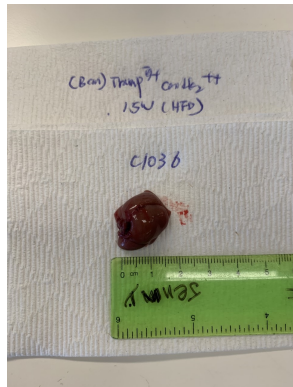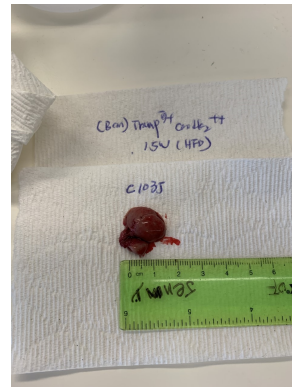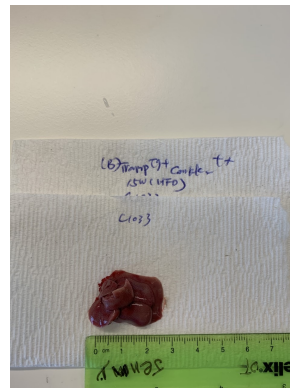



# 30-week HFD KO

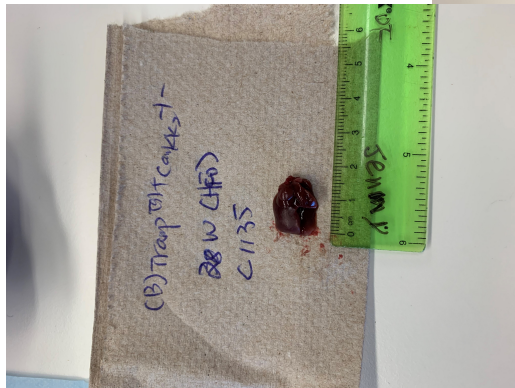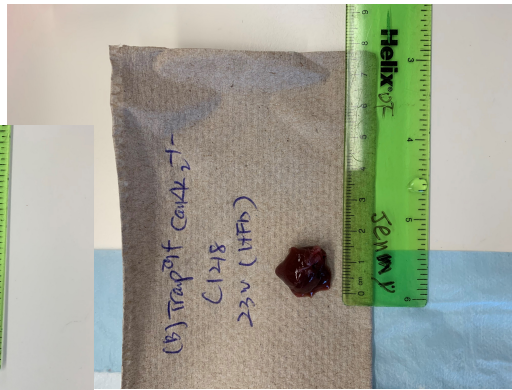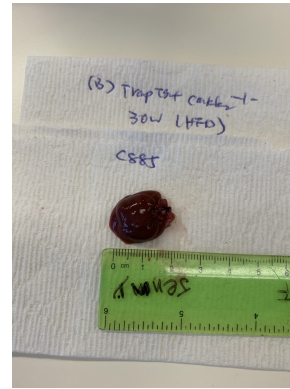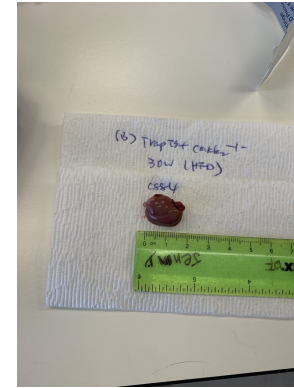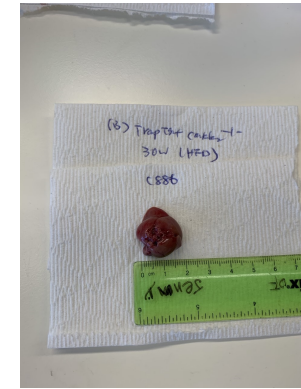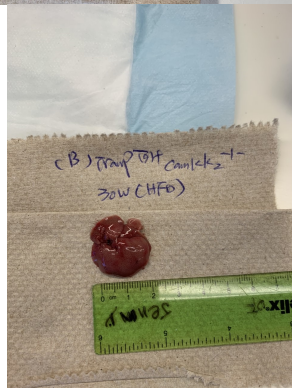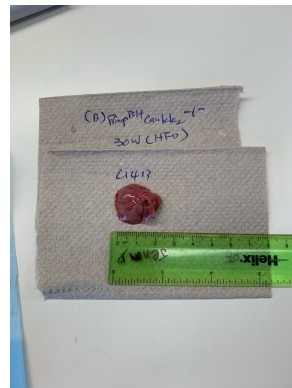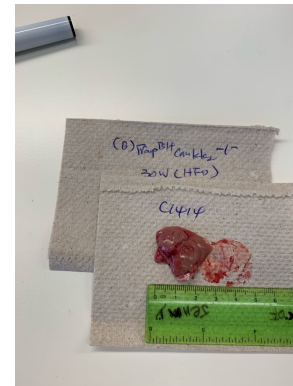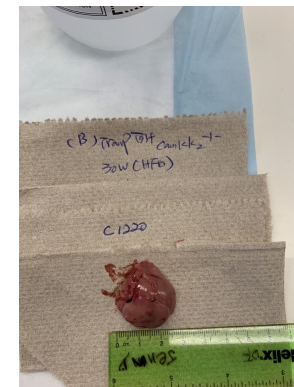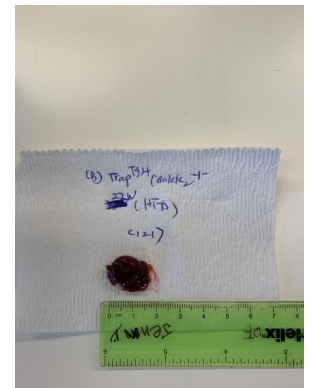



# 30-week HFD WT

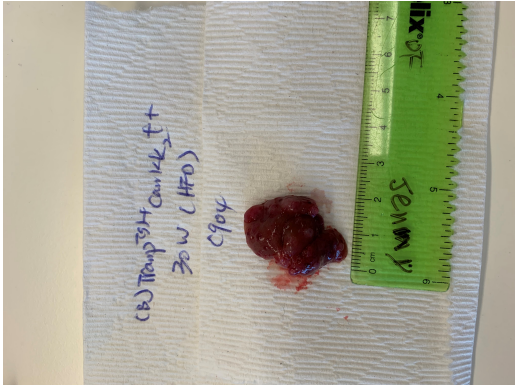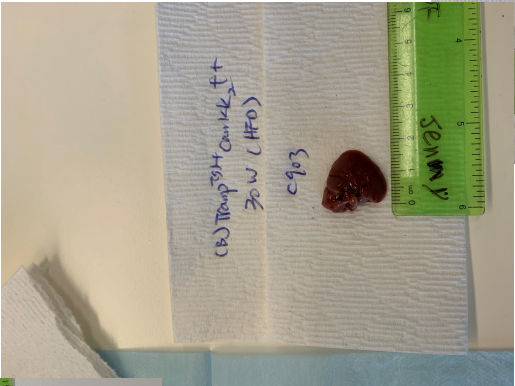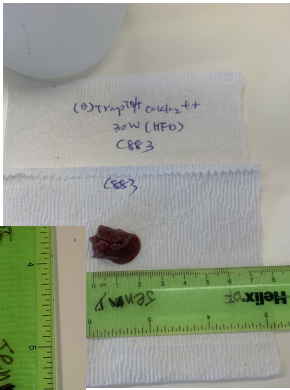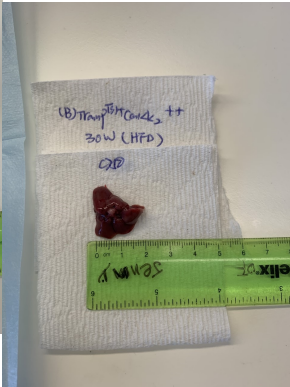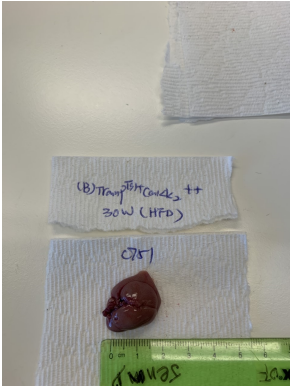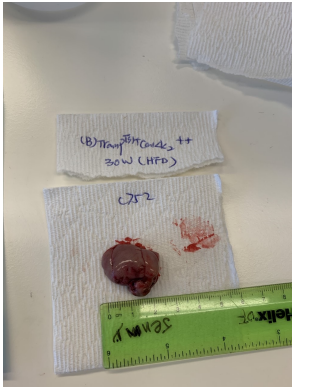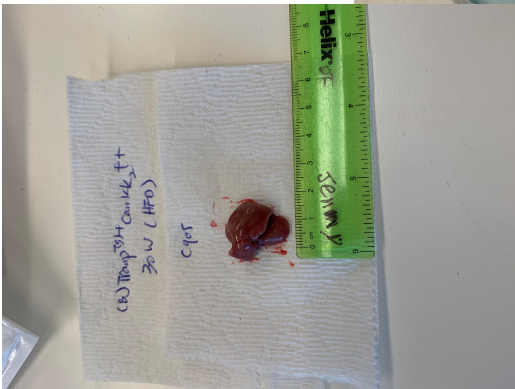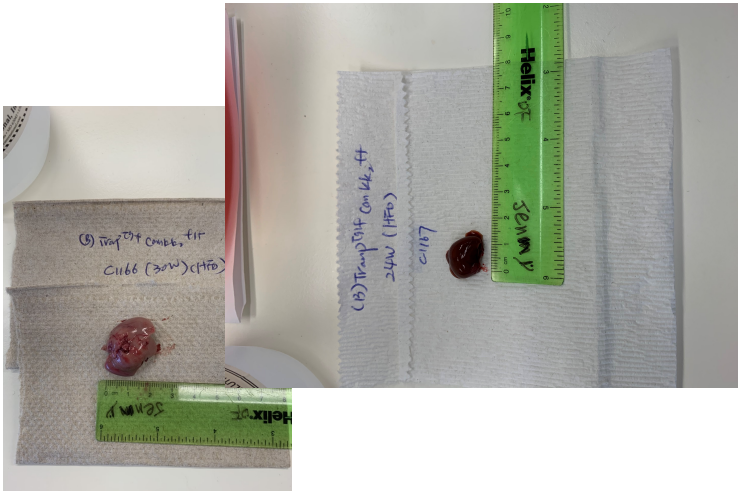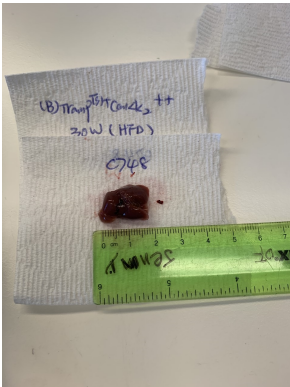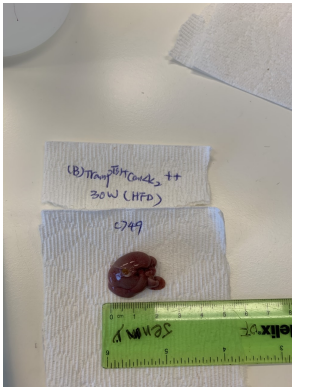

## Liver weights

|    | 15 WKS (HFD) |      |      |      |      |      |      |      |      |      | 30 WKS (HFD) |      |      |      |      |      |      |      |      |      |
|----|--------------|------|------|------|------|------|------|------|------|------|--------------|------|------|------|------|------|------|------|------|------|
| WT | 1.52         | 1.54 | 1.52 | 2.54 | 1.85 | 1.26 | 1.68 | 1.44 | 1.03 | 1.42 | 1.07         | 2.18 | 1.49 | 2.3  | 3.29 | 2.53 | 1.42 | 2.09 | 3.62 | 1.16 |
| KO | 1.51         | 0.7  | 1.38 | 1.43 | 1.22 | 1.27 | 1.2  | 0.99 |      |      | 1.49         | 2.54 | 1.78 | 0.82 | 1.02 | 1.23 | 2.08 | 3.93 | 2.74 | 2.56 |

|                   |           |
|-------------------|-----------|
| Average 15wks HFD | WT 1.58   |
|                   | KO 1.2125 |
